# Supplementary material for: Clinically Relevant and Minimally Invasive Tumor Surveillance of Pediatric Diffuse Midline Gliomas Using Patient-Derived Liquid Biopsy
Source: Oxford University Press journal article supplement (doi:10.1158/1078-0432.ccr-18-1345), 2018-10-15
Supplement: 10780432ccr181345-sup-201077_2_supp_4967165_pd3qg9.xlsx [file 10780432ccr181345-sup-201077_2_supp_4967165_pd3qg9.xlsx]

## Sheet: Sheet1
	Supplementary Table 4: Clinical information for PNOC003 plasma ctDNA studies.
	PID	Plasma samples	Clinical time point	Months post radiation
PNOC003	P-01	1	Biopsy	-50
		2	Did not follow PNOC003 recommended therapy	20
		3		75
		4		132
		5		206
		6		270
		7		356
		8	Progression	458
		9	EOT	528
	P-02	1	Biopsy	-1
		2	Pre C1	1
		3	Pre C3/Progression	4
	P-04	1	Biopsy
	P-05	1	Biopsy	-0.2
		2	Did not follow PNOC003 recommended therapy	1
		3		2.3
	P-06	1	Biopsy	-1
		2	Pre C1	1
		3	Pre C3	4
		4	Pre C5	7
		5	Progression	10.3
		6	EOT	11.6
		7	EOT	12.5
	P-07	1	Biopsy	-13
		2	Did not follow PNOC003 recommended therapy	7
		3		25
		4	Progression	66
		5	EOT	102
		6	EOT	121
	P-08	1	Biopsy
	P-09	1	Biopsy	-1.23
		2	Did not follow PNOC003 recommended therapy	0.16
		3		2
		4		3
		5		5
		6		6
	P-10	1	Biopsy	-1
		2	Pre C1	1
		3	Pre C3/Progression	4
		4	EOT	6
	P-11	1	Biopsy
	P-12	1	Biopsy	-2
		2	Pre C1	1
		3	Progression/EOT	3
	P-13	1	Biopsy	-2
		2	Pre C1	1
		3	Pre C3	5
		4	Progression/EOT	6
	P-14	1	Biopsy
	P-16	1	Biopsy	-2
		2	Pre C1	1
		3	Pre C3	4
		4	Did not follow PNOC003 recommended therapy	5
	P-17	1	Biopsy	-1.8
		2	Did not follow PNOC003 recommended therapy	1
	P-19	1	Biopsy
	P-20	1	Biopsy
	P-21	1	Biopsy	-1
		2	Pre C1	0.4
		3	Progression/EOT	4.4
	P-23	1	Biopsy	-1.9
		2	Pre C1	0.8
		3	Pre C3	2.7
		4	Pre C5	4.6
		5	Pre C7	6.4
		6	Pre C9	8.5
		7	Pre C11	10.2
		8	Pre C13	12.2
	P-26	1	Biopsy	-0.5
		2	Pre C1	1.7
		3	Pre C2	2
		4	After C3	3.8
	P-27	1	Biopsy	-1.73
		2	during treatment	-0.06
		3	Pre C1	1
		4	during treatment	1.6
		5	during treatment	2
		6	during treatment	3.9
	P-31	1	Biopsy
	P-34	1	Biopsy
Supplementary table 4. Clinical information for PNOC003 plasma ctDNA studies. EOT denotes end of therapy
