# Supplementary material for: Clinically Relevant and Minimally Invasive Tumor Surveillance of Pediatric Diffuse Midline Gliomas Using Patient-Derived Liquid Biopsy
Source: Oxford University Press journal article supplement (doi:10.1158/1078-0432.ccr-18-1345), 2018-10-15
Supplement: 10780432ccr181345-sup-201077_2_supp_4967166_pd1qg9.xlsx [file 10780432ccr181345-sup-201077_2_supp_4967166_pd1qg9.xlsx]

## Sheet: Sheet1
	Supplementary Table 2: Biofluid samples from MLG patients used in this study.
	PID	Diagnosis	Age at Diagnosis	Gender	WHO Grade	Mutations analyzed	Tumor	Plasma	Plasma timepoint	CSF	CSF timepoint
PNOC003	P-01	DIPG	4y	F	II	H3F3A K27M		√	Upfront, during treatment, progression, EOT
	P-02	DIPG	5y	F	III	H3F3A K27M		√	Upfront, during treatment, progression/EOT
	P-04	DIPG	9y	M	II	H3F3A K27M	√	√	Upfront	√	Postmortem
	P-05	DIPG	8y	M	High grade	H3F3A K27M		√	Upfront, during treatment
	P-06	DIPG	13y	M	II	H3F3A K27M		√	Upfront, during treatment, progression, EOT
	P-07	DIPG	7y	F	III	H3F3A K27M; PIK3R1 K567E	√	√	Upfront, during treatment, progression, EOT	√	Postmortem
	P-08	DIPG	14y	M	II	H3F3A K27M		√	Upfront
	P-09	DIPG	7y	F	II	H3F3A K27M		√	Upfront, during treatment
	P-10	DIPG	9y	M	II	H3F3A K27M		√	Upfront, during treatment, progression
	P-11	DIPG	25y	M	III	H3F3A K27M		√	Upfront
	P-12	DIPG	10y	M	III-IV	H3F3A K27M		√	Upfront, during treatment, progression/EOT
	P-13	DIPG	5y	M	Low grade	H3F3A K27M		√	Upfront, during treatment, progression/EOT
	P-14	DIPG	6y	F	II	H3F3A K27M		√	Upfront
	P-16	DIPG	4y	F	III	HIST1H3B K27M	√	√	Upfront, during treatment	√	Postmortem
	P-17	DIPG	5y	M	II	H3F3A K27M		√	Upfront, during treatment
	P-19	DIPG	12y	M		H3F3A K27M		√	Upfront
	P-20	DIPG	4y	F	IV	HIST1H3B K27M		√	Upfront
	P-21	DIPG	2y	M		H3F3A K27M		√	Upfront, during treatment, EOT
	P-23	DIPG	4y	F	N/A	H3F3A K27M		√	Upfront, during treatment
	P-26	DIPG	5y 5m	M	IV	H3F3A K27M		√	Upfront, during treatment, progression/EOT
	P-27	DIPG	6y	M	IV	H3F3A K27M		√	Upfront, during treatment, progression
	P-31	DIPG	6y	M	IV	H3F3A K27M		√	Upfront
	P-34	DIPG	6y	M	IV	H3F3A K27M		√	Upfront
Children's national brain tumor biorepository	6	DIPG	14y	F	IV	H3F3A K27M				√	Postmortem
	7	DIPG	5y	F	IV	H3F3A K27M; ACVR1 R206H	√			√	Postmortem
	10	DIPG	8y	M	IV	H3F3A K27M	√			√	Postmortem
	13	DIPG	19y 8m	M	IV	H3F3A K27M;	√			√	Postmortem
	14	DIPG	6y	M	II	HIST1H3B K27M	√			√	Postmortem
	26	DIPG	9y 9m	F	IV	H3F3A K27M	√			√	Postmortem
	27	DIPG	5y 6m	M	IV	HIST1H3B K27M; ACVR1 G328V	√			√	Postmortem
	29	DIPG	8y	M	IV	H3F3A K27M	√			√	Postmortem
	51	DIPG	7y	F	N/A	H3F3A K27M	√			√	Postmortem
	53	DIPG	16y	F	N/A	H3F3A K27M	√			√	Postmortem
	55	DIPG	5y	F	N/A	HIST1H3B K27M				√	Upfront
	56	DIPG	7y 6m	M	IV	H3F3A K27M	√			√	Postmortem
	57	DIPG	6y	M	IV	H3F3A K27M	√			√	Postmortem
	60	DIPG	6y	M	IV	H3F3A K27M	√			√	Postmortem
	62	DIPG	5y 4m	F	IV	HIST1H3B K27M	√			√	Postmortem
	63	DIPG	3y 4m	F	IV	HIST1H3B K27M	√			√	Postmortem
	64	DIPG	N/A	M	N/A	H3F3A K27M					Postmortem
	65	DIPG	N/A	M	IV	H3F3A K27M	√			√	Upfront
	66	DIPG	8y	M	II	H3F3A K27M	√			√	Upfront & Postmortem
	67	Thalamic astrocytoma WHO III	16y	M	III	H3F3A K27M	√			√	Upfront
	68	Thalamic glioma	20y	M	IV	H3F3A K27M				√	Postmortem
	69	Thalamic glioma	15y	M	II	H3F3A K27M				√	Progression
	70	DIPG	5y	F	IV	H3F3A K27M				√	During treatment (pre-chemotherapy, post-radiation)
	71	DIPG	5y	F	N/A	H3F3A K27M				√	During treatment
	72	Thalamic glioma	18y	M	IV	H3F3A K27M	√			√	Postmortem
Supplementary table 2. Midline glioma patient demographic information, and samples analyzed for genomic and ctDNA studies. Genomic alterations were determined by sequencing conducted for PNOC003 clinical trial and biorepository sequencing study. Validation by ddPCR analysis of tumor samples are indicated in the table. EOT denotes end of therapy time point.
